# Supplementary material
Source: PubMed Central journal article supplement (PMC4432213)
Supplement: AAC.04765-14_zac006154059so1.pdf [file AAC.04765-14_zac006154059so1.pdf]

Table S1. Characteristics of infection in patients with hVISA bacteremia according to definitive treatment regimen

| Characteristic                      | Definitive linezolid | Definitive glycopeptide | <i>P</i> |
|-------------------------------------|----------------------|-------------------------|----------|
|                                     | therapy (n = 32)     | therapy (n = 89)        |          |
| Metastatic infection                | 10 (31.3)            | 16 (18.0)               | 0.117    |
| Infective endocarditis <sup>a</sup> | 6 (18.8)             | 6 (6.7)                 | 0.080    |
| Catheter-related infection          | 17 (53.1)            | 42 (47.2)               | 0.565    |
| Pneumonia                           | 3 (9.4)              | 8 (9.0)                 | 0.999    |
| Skin and soft tissue infection      | 1 (3.1)              | 5 (5.6)                 | 0.999    |
| Bone and joint infection            | 3 (9.4)              | 3 (9.4)                 | 0.188    |
| Post-operative wound infection      | 1 (3.1)              | 8 (9.0)                 | 0.442    |
| Primary bacteremia                  | 2 (6.3)              | 11 (12.4)               | 0.510    |

Data are presented as number (%).

<sup>a</sup> Six patients who had had persistent bacteremia despite adequate vancomycin trough level (15-20 mg/L) were treated with linezolid. Of these patients, 5 patients were successfully treated with linezolid.
